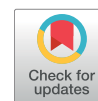

# Diabetes Incidence Among Hispanic/Latino Adults in the Hispanic Community Health Study/Study of Latinos (HCHS/SOL)

*Diabetes Care* 2022;45:1482–1485 | <https://doi.org/10.2337/dc21-1543>

Christina Cordero,<sup>1</sup> Neil Schneiderman,<sup>1</sup> Maria M. Llabre,<sup>1</sup> Yanping Teng,<sup>2</sup> Martha L. Daviglus,<sup>3</sup> Catherine C. Cowie,<sup>4</sup> Jianwen Cai,<sup>2</sup> Gregory A. Talavera,<sup>5</sup> Linda C. Gallo,<sup>5</sup> Robert C. Kaplan,<sup>6</sup> Elizabeth M. Cespedes Feliciano,<sup>7</sup> Rebeca A. Espinoza Giacinto,<sup>5</sup> Aida L. Giachello,<sup>8</sup> and Larissa Avilés-Santa<sup>9</sup>

## OBJECTIVE

To examine diabetes incidence in a diverse cohort of U.S. Hispanic/Latinos.

## RESEARCH DESIGN AND METHODS

The Hispanic Community Health Study/Study of Latinos is a prospective cohort study with participants aged 18–74 years from four U.S. metropolitan areas. Participants were assessed for diabetes at the baseline examination (2008–2011), annually via telephone interview, and at a second examination (2014–2017).

## RESULTS

A total of 11,619 participants returned for the second examination. The overall age-adjusted diabetes incidence rate was 22.1 cases/1,000 person-years. The incidence was high among those with Puerto Rican and Mexican backgrounds as well as those aged ≥45 years and with a BMI ≥30 kg/m<sup>2</sup>. Significant differences in diabetes awareness, treatment, and health insurance coverage, but not glycemic control, were observed across Hispanic/Latino background groups, age groups, and BMI categories.

## CONCLUSIONS

Differences in diabetes incidence by Hispanic/Latino background, age, and BMI suggest the susceptibility of these factors.

The prevalence of diabetes is higher among Hispanic/Latinos compared with non-Hispanic Whites (1), and the prevalence and incidence of diabetes is rising among Hispanic/Latinos since the 1980s, while the prevalence has leveled off and incidence decreased among non-Hispanic Whites (2,3). This is a cause for public health concern, as Hispanics are the largest minority group in the U.S., representing >60 million people and 18.1% of the population (4). The objective of this study is to determine the incidence of diabetes in a diverse cohort of Hispanic/Latinos in the U.S.

## RESEARCH DESIGN AND METHODS

The Hispanic Community Health Study/Study of Latinos (HCHS/SOL) is an observational population study designed to assess chronic diseases and risk factors among Hispanic/Latinos (5,6). From 2008 to 2011, 16,415 participants aged 18–74 years

<sup>1</sup>Department of Psychology and Behavioral Medicine Research Center, University of Miami, Miami, FL

<sup>2</sup>Department of Biostatistics, University of North Carolina at Chapel Hill, Chapel Hill, NC

<sup>3</sup>College of Medicine and Institute for Minority Health Research, University of Illinois at Chicago, Chicago, IL

<sup>4</sup>National Institute of Diabetes and Digestive and Kidney Diseases, National Institutes of Health, Bethesda, MD

<sup>5</sup>Department of Psychology, San Diego State University, San Diego, CA

<sup>6</sup>Department of Epidemiology and Population Health, Albert Einstein College of Medicine, Bronx, NY

<sup>7</sup>Division of Research, Kaiser Permanente Northern California, Oakland, CA

<sup>8</sup>Department of Preventative Medicine, Feinberg School of Medicine, Northwestern University, Chicago, IL

<sup>9</sup>National Institute on Minority Health and Health Disparities, National Institutes of Health, Bethesda, MD

Corresponding author: Christina Cordero, [c.cordero@med.miami.edu](mailto:c.cordero@med.miami.edu)

Received 25 July 2021 and accepted 25 March 2022

© 2022 by the American Diabetes Association. Readers may use this article as long as the work is properly cited, the use is educational and not for profit, and the work is not altered. More information is available at <https://www.diabetesjournals.org/journals/pages/license>.

were recruited across four metropolitan areas in the U.S.: Chicago, Miami, New York, and San Diego. Study participants underwent a baseline examination, and 11,619 returned for a second examination (visit 2) ~6 years later from 2014 to 2017 (5). In addition, participants were contacted annually for a telephone follow-up interview to identify any clinical events or mortality. The HCHS/SOL study design, baseline examination, and procedures have been published previously (5,6).

### Diabetes Assessment

Study procedures regarding diabetes ascertainment have previously been described in detail (7). Diabetes was defined based on self-report at annual follow-up call or at the visit 2 examination, which additionally included use of antihyperglycemic medication or American Diabetes Association laboratory criteria (8). Glycemic control was defined as an A1C level <7.0% (53 mmol/mol) (9).

### Statistical Analyses

Statistical analyses were conducted on all HCHS/SOL participants with diabetes data who completed both the baseline and visit 2 examinations. All reported prevalence and incidence rate (IR) values and corresponding 95% CIs were weighted to adjust for sampling probability and non-response at baseline and visit 2, trimmed to handle extreme values of the weights, and calibrated to the age, sex, and Hispanic/Latino background distributions from the 2010 U.S. Census for the four study field centers (6). By using the sampling weights that adjusted for the non-response for visit 2, the inference of the IR estimates based on only participants who returned to visit 2 applies to the HCHS/SOL study population without diabetes at baseline. Sample sizes (*N*) reported are unweighted. Age-adjusted IR and 95% CIs were calculated for new cases of diabetes that occurred after the baseline examination and up until the visit 2 examination and are presented per 1,000 person-years (PY) of follow-up. In order to account for interval-censored data from annual follow-ups for diabetes incidence, a Poisson regression model was used with an offset for the time between annual follow-ups. Among people with diabetes, percentages were obtained for diabetes awareness, health

insurance coverage, antihyperglycemic medication use, and glycemic control. Participant characteristics include sex, age at visit 2, Hispanic/Latino background (determined by self-report), and BMI (calculated as kilograms per meter squared from measures at the clinic examination). All analyses were performed using SAS version 9.4 (SAS Institute) and SUDAAN release 10.0.0 (RTI International).

### RESULTS

For the target population of the HCHS/SOL, the overall age-adjusted diabetes IR was 22.1 cases/1,000 PY (95% CI 20.6, 23.8) and was similar among men and women (Table 1). Diabetes prevalence at visit 2 was 24.5% (95% CI 23.5, 25.6). At visit 2, differences were observed by Hispanic/Latino background, with individuals with Puerto Rican and South American backgrounds having the highest and lowest IR and prevalence, respectively. As expected, higher prevalence rates were observed among older age groups. However, the IRs for the 45–64 and ≥65-year-old age groups were not substantially different. Generally, diabetes IR and prevalence increased with increasing BMI category, with the obese category having the highest IR and prevalence. In the underweight category, small sample sizes and wide CIs limit accurate interpretation of these results.

Among individuals with diabetes, differences in diabetes awareness, access to health care, and treatment were observed by age, BMI, and Hispanic/Latino background. No significant differences in glycemic control were observed for these factors. Women (compared with men) had slightly greater diabetes awareness, treatment for diabetes, and glycemic control, despite having similar health insurance coverage. Among background groups, those with Puerto Rican and Central American backgrounds had the highest and lowest proportion of diabetes awareness, respectively, and those with a Dominican background had the highest proportion receiving treatment, yet lowest A1C control. Among age groups, the ≥65-year-old age category had the highest proportion of diabetes awareness, diabetes treatment, and health insurance coverage.

### CONCLUSIONS

In the target population of the HCHS/SOL, the incidence of diabetes was 22.1

cases/1,000 PY, and the prevalence of diabetes increased from 16.9% at baseline (7) to 24.5% over a median follow-up of ~6 years. Diabetes incidence in Hispanic/Latinos was higher in our study compared with a previous national study reporting an overall incidence of 8.8/1,000 people in 2008, which was higher among Hispanic/Latinos at ~14.0/1,000 people (2). This higher incidence in the HCHS/SOL was expected, as this is a longitudinal observation of an older cohort that continues to be screened for diabetes, which has its strengths and limitations.

Across background groups, people with a South American background had the lowest incidence and prevalence of diabetes, while those with Puerto Rican and Mexican backgrounds had the highest incidence and prevalence. These results are consistent with findings from the Hispanic Health and Nutrition Examination Survey reporting a higher prevalence of diabetes among people with a Puerto Rican background (10). The incidence of diabetes was high among people with a BMI ≥30 kg/m<sup>2</sup>, and findings from the HCHS/SOL also show that the prevalence of obesity at baseline is higher in those with Puerto Rican and Mexican backgrounds (11).

Health insurance coverage and diabetes awareness were high at visit 2. It is likely that health insurance coverage increased due to the implementation of the Affordable Care Act, and diabetes awareness increased due to health insurance coverage and the study results being returned to participants at baseline. Compared with other background groups, those with a Cuban background had the highest proportion with glycemic control despite having the lowest proportion insured, and those with a Dominican background had the lowest glycemic control despite having the highest treatment. In addition, changes in diabetes treatment and glycemic control were not significant and varied in direction by Hispanic/Latino background group, indicating that barriers to health persist in this population.

To our knowledge, this is the first study to examine diabetes incidence across a longitudinal cohort of diverse Hispanic/Latino background groups. Limitations include participants not returning for a clinic examination and not distinguishing between type 1 and type 2 diabetes. However, prevalence of diabetes was low

**Table 1.—IR and prevalence of diabetes and related characteristics by sex, Hispanic/Latino background, age, and BMI among Hispanic/Latino adults returning for HCHS/SOL visit 2 (2014–2017) examination**

|                            | Sample size (N) | IR <sup>a</sup> (95% CI) | Prevalence <sup>b</sup> at visit 2 | Among adults with diabetes <sup>b</sup> |                   |                   |                   |
|----------------------------|-----------------|--------------------------|------------------------------------|-----------------------------------------|-------------------|-------------------|-------------------|
|                            |                 |                          |                                    | Awareness                               | Health insurance  | Treatment         | A1C control (<7%) |
| Overall                    | 11,619          | 22.1 (20.6, 23.8)        | 24.5 (23.5, 25.6)                  | 78.9 (75.2, 82.2)                       | 77.2 (73.7, 80.3) | 46.7 (42.9, 50.5) | 57.6 (53.7, 61.5) |
| Men                        | 4,280           | 22.1 (19.8, 24.7)        | 24.2 (22.7, 25.7)                  | 77.2 (71.6, 81.9)                       | 77.6 (72.3, 82.2) | 44.9 (39.9, 50.1) | 54.5 (48.6, 60.3) |
| Women                      | 7,339           | 22.2 (20.2, 24.4)        | 24.8 (23.5, 26.2)                  | 80.4 (75.2, 84.6)                       | 76.8 (72.4, 80.7) | 48.4 (43.1, 53.9) | 60.2 (54.7, 65.4) |
| Hispanic/Latino background |                 |                          |                                    |                                         |                   |                   |                   |
| Dominican                  | 1,020           | 18.6 (14.6, 23.8)        | 24.2 (21.3, 27.3)                  | 74.9 (66.5, 81.8)                       | 91.4 (79.2, 96.8) | 56.7 (45.6, 67.2) | 53.1 (39.4, 66.4) |
| Central American           | 1,207           | 13.3 (10.6, 16.6)        | 20.1 (17.9, 22.5)                  | 60.6 (53.5, 67.4)                       | 73.5 (64.7, 80.8) | 44.2 (36.3, 52.4) | 55.9 (48.5, 63.2) |
| Cuban                      | 1,644           | 17.5 (15.1, 20.3)        | 17.6 (15.9, 19.6)                  | 82.6 (78.6, 86.0)                       | 71.4 (49.4, 86.5) | 42.3 (27.9, 58.1) | 64.9 (48.6, 78.4) |
| Mexican                    | 4,804           | 26.5 (23.9, 29.4)        | 27.8 (26.1, 29.5)                  | 82.4 (78.0, 86.0)                       | 67.5 (62.3, 72.4) | 44.5 (39.5, 49.6) | 59.1 (54.2, 63.9) |
| Puerto Rican               | 1,801           | 27.1 (22.6, 32.5)        | 29.1 (26.3, 32.0)                  | 86.9 (80.9, 91.2)                       | 92.8 (87.3, 96.0) | 52.1 (42.9, 61.2) | 55.4 (45.3, 65.1) |
| South American             | 795             | 12.3 (8.9, 17.0)         | 14.2 (11.5, 17.4)                  | 69.5 (65.1, 73.6)                       | 80.9 (64.0, 91.0) | 28.6 (21.6, 36.9) | 59.1 (52.3, 65.7) |
| Mixed/other                | 313             | 29.7 (20.4, 43.2)        | 25.8 (20.7, 31.6)                  | 72.7 (65.8, 78.6)                       | 82.9 (61.2, 93.7) | 30.8 (22.6, 40.5) | 71.7 (59.3, 81.5) |
| Age-group (years)          |                 |                          |                                    |                                         |                   |                   |                   |
| 18–44                      | 2,757           | 12.1 (10.0, 14.6)        | 12.0 (10.5, 13.7)                  | 76.2 (69.3, 81.9)                       | 71.7 (65.0, 77.5) | 36.8 (30.3, 43.9) | 57.4 (50.4, 64.0) |
| 45–64                      | 6,487           | 31.0 (28.6, 33.6)        | 31.8 (30.1, 33.5)                  | 79.7 (76.6, 82.5)                       | 75.2 (71.7, 78.5) | 52.0 (48.4, 55.7) | 56.4 (52.8, 59.9) |
| ≥65                        | 2,350           | 37.6 (32.2, 43.9)        | 49.4 (46.4, 52.4)                  | 87.2 (84.5, 89.5)                       | 96.9 (95.6, 97.9) | 71.4 (67.4, 75.1) | 60.4 (56.2, 64.5) |
| BMI (kg/m <sup>2</sup> )   |                 |                          |                                    |                                         |                   |                   |                   |
| Underweight (<18.5)        | 69              | 17.5 (4.2, 72.0)         | 15.1 (7.2, 29.1)                   | 88.5 (74.4, 95.3)                       | 58.8 (45.5, 71.0) | 52.7 (39.8, 65.2) | 96.9 (81.6, 99.5) |
| Normal (18.5 to <25)       | 1,911           | 9.0 (6.9, 11.6)          | 15.1 (13.2, 17.1)                  | 91.2 (86.6, 94.3)                       | 70.2 (57.6, 80.3) | 47.8 (36.6, 59.3) | 57.7 (45.7, 68.9) |
| Overweight (25 to <30)     | 4,341           | 18.4 (16.0, 21.1)        | 21.1 (19.6, 22.7)                  | 83.8 (79.2, 87.6)                       | 70.8 (63.6, 77.0) | 41.6 (35.5, 48.0) | 60.6 (52.8, 67.8) |
| Obese (≥30)                | 4,923           | 32.5 (29.4, 36.0)        | 31.4 (29.7, 33.2)                  | 73.5 (67.7, 78.6)                       | 82.3 (78.8, 85.4) | 49.1 (43.8, 54.5) | 56.0 (50.5, 61.4) |

Data are percent (95% CI) unless otherwise indicated. <sup>a</sup>Per 1,000 PY follow-up, age-adjusted among individuals who completed visit 2 examination. <sup>b</sup>Prevalence results are weighted and standardized to the U.S. 2010 standard population.

in individuals aged <30 years, suggesting a large majority of people with diabetes in our study have type 2 diabetes (7). Future studies in HCHS/SOL should be proposed to evaluate potential mechanisms of disease not included in our analysis, such as other coexisting chronic conditions, the early onset and chronicity of obesity, systemic inflammation, early life exposures or events, nutritional factors, chronic conditions, environmental exposures, genetics/genomics, and others. Further interventions should be considered to address health disparities by Hispanic/Latino background groups.

**Acknowledgments.** The authors thank the staff and participants of HCHS/SOL for the important contributions. A complete list of the staff and investigators for the baseline examination can be found in Ann Epidemiol 2010; 20:642–649, and a current list is also available on the study website at <https://www.csc.unc.edu/hchs/>.

**Funding.** The HCHS/SOL is a collaborative study supported by contracts from the National Heart, Lung, and Blood Institute (NHLBI) to the University of North Carolina (HHSN268201300001/N01-HC-65233), University of Miami (HHSN268201300004/N01-HC-65234), Albert Einstein College of Medicine (HHSN268201300002/N01-HC-65235), University of Illinois at Chicago (HHSN268201300003/N01-HC-65236), and San Diego State University (HHSN268201300005/N01-HC-65237). The following institutes/centers/offices have contributed to the HCHS/SOL through a transfer of funds to the NHLBI: National Institute on Minority Health and Health Disparities, National Institute on Deafness and Other Communication Disorders, National Institute of Dental and Craniofacial Research, National Institute of Diabetes and Digestive and Kidney Diseases, National Institute of Neurological Disorders and Stroke, and the National Institutes of Health Office of Dietary Supplements. This study was partially supported by the New York Regional Center for Diabetes Translation Research (P30 DK111022).

The views expressed in this manuscript are those of the authors and do not necessarily reflect the official views of the National Institute on Minority Health and Health Disparities, the National Institutes of Health, or the U.S. federal government.

**Duality of Interest.** No potential conflicts of interest relevant to this article were reported.

**Author Contributions.** C.C. researched the literature, interpreted the data, and wrote the manuscript. N.S. and M.M.L. planned and organized the manuscript and data analysis. Y.T. analyzed the data and was involved in manuscript preparation. N.S., M.M.L., Y.T., M.L.D., C.C.C., J.C., G.A.T., L.C.G., R.C.K., E.M.C.F., R.A.E.G., A.L.G., and L.A.S. contributed to the interpretation of

the data, and they were involved in manuscript preparation, and critically reviewed and edited the manuscript. C.C. is the guarantor of this work and, as such, had full access to all of the data in the study and takes responsibility for the integrity of the data and the accuracy of the data analysis.

**Prior Presentation.** Preliminary results from this study were presented at the 78th Scientific Sessions of the American Diabetes Association, Orlando, FL, 22–26 June 2018.

## References

- Centers for Disease Control and Prevention. *National Diabetes Statistics Report, 2020*. Atlanta, GA, Centers for Disease Control and Prevention, U.S. Department of Health and Human Services, 2020, p. 12–15
- Geiss LS, Wang J, Cheng YJ, et al. Prevalence and incidence trends for diagnosed diabetes among adults aged 20 to 79 years, United States, 1980–2012. *JAMA* 2014;312:1218–1226
- Menke A, Casagrande S, Geiss L, Cowie CC. Prevalence of and trends in diabetes among adults in the United States, 1988–2012. *JAMA* 2015;314:1021–1029
- U.S. Census Bureau. 2019 National and State Population Estimates [article online], 2019. Accessed 25 September 2020. Available from <https://www.census.gov/newsroom/press-kits/2019/national-state-estimates.html>
- Sorlie PD, Avilés-Santa LM, Wassertheil-Smoller S, et al. Design and implementation of the Hispanic Community Health Study/Study of Latinos. *Ann Epidemiol* 2010;20:629–641
- Lavange LM, Kalsbeek WD, Sorlie PD, et al. Sample design and cohort selection in the Hispanic Community Health Study/Study of Latinos. *Ann Epidemiol* 2010;20:642–649
- Schneiderman N, Llabre M, Cowie CC, et al. Prevalence of diabetes among Hispanics/Latinos from diverse backgrounds: the Hispanic Community Health Study/Study of Latinos (HCHS/SOL). *Diabetes Care* 2014;37:2233–2239
- American Diabetes Association. 2. Classification and diagnosis of diabetes: *Standards of Medical Care in Diabetes—2020*. *Diabetes Care* 2020;43(Suppl. 1):S14–S31
- American Diabetes Association. 6. Glycemic targets: *Standards of Medical Care in Diabetes—2021*. *Diabetes Care* 2021;44(Suppl. 1):S73–S84
- Flegal KM, Ezzati TM, Harris MI, et al. Prevalence of diabetes in Mexican Americans, Cubans, and Puerto Ricans from the Hispanic Health and Nutrition Examination Survey, 1982–1984. *Diabetes Care* 1991;14:628–638
- Daviglus ML, Talavera GA, Avilés-Santa LM, et al. Prevalence of major cardiovascular risk factors and cardiovascular diseases among Hispanic/Latino individuals of diverse backgrounds in the United States. *JAMA* 2012;308:1775–1784
